# Supplementary material for: Genetic microheterogeneity and phenotypic variation of Helicobacter pylori arginase in clinical isolates
Source: PubMed Central journal article supplement (PMC1853099; doi:10.1186/1471-2180-7-26), 2007-04-04

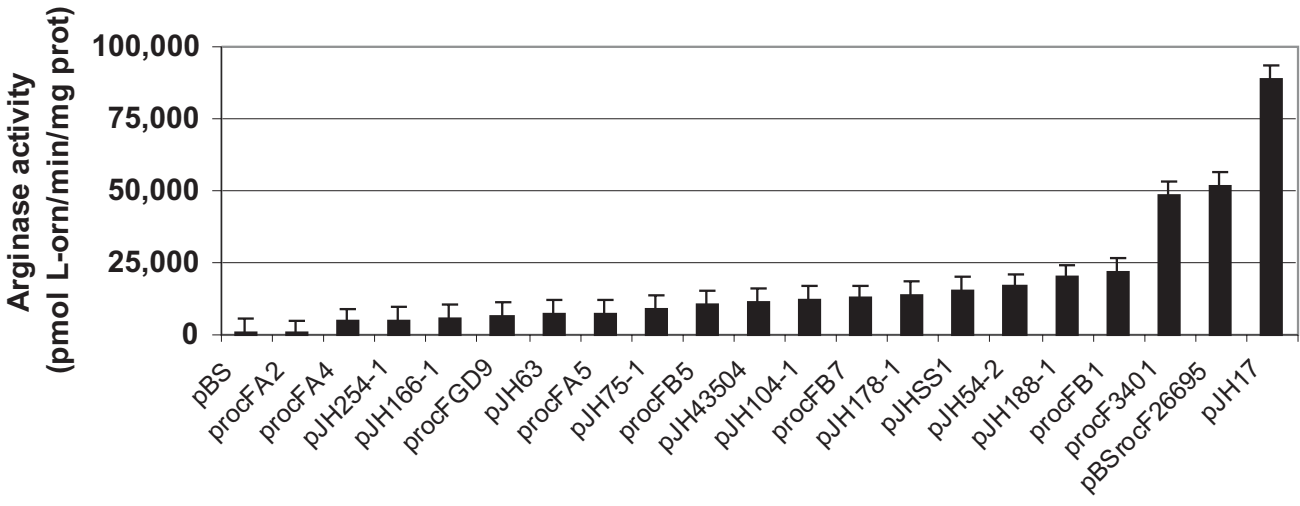

Supplement: 1471-2180-7-26-S3.pdf [file 1471-2180-7-26-S3.pdf]
